# Supplementary material for: Ultrafine Co3O4 nanoparticles-engineered binary metal nitride nanorods with interfacial charge redistribution for enhanced water splitting
Source: Royal Society of Chemistry journal article supplement (doi:10.1039/d3ta04768g), 2023-01-01
Supplement: d3ta04768g2.pdf [file d3ta04768g2.pdf]

## Supporting Information

### Ultrafine $\text{Co}_3\text{O}_4$ Nanoparticles-Engineered Binary Metal Nitride Nanorods with Interfacial Charge Redistribution for Enhanced Water Splitting

Dinh Chuong Nguyen<sup>a</sup>, Thi Luu Luyen Doan<sup>b</sup>, Xinfeng Zhu<sup>a</sup>,

Nam Hoon Kim<sup>a\*</sup>, Joong Hee Lee<sup>a,c\*</sup>

<sup>a</sup>Department of Nano Convergence Engineering, Jeonbuk National University, Jeonju, Jeonbuk, 54896, Republic of Korea.

<sup>b</sup>Division of Mechanical Design Engineering, School of Engineering, Jeonbuk National University, Jeollabuk-do Jeonju 54896, Republic of Korea.

<sup>c</sup>Carbon Composite Research Center, Department of Polymer-Nano Science and Technology, Jeonbuk National University, Jeonju, Jeonbuk, 54896, Republic of Korea.

\*Corresponding author: Tel.: +82 63 270 2301; Fax: +82 63 270 2341.

E-mail address: [nhk@jbnu.ac.kr](mailto:nhk@jbnu.ac.kr) (Prof. Nam Hoon Kim)

[jhl@jbnu.ac.kr](mailto:jhl@jbnu.ac.kr) (Prof. Joong Hee Lee).

### **Synthesis of Co-Zn-(OH-CO<sub>3</sub>)**

Co-Zn-(OH-CO<sub>3</sub>) nanorod arrays were grown on the surface of NF substrate by a hydrothermal method. Typically, the pre-treated NF was dipped in 50 mL solution containing 0.08 M Co(NO<sub>3</sub>)<sub>2</sub>·6H<sub>2</sub>O, 0.04 M Zn(NO<sub>3</sub>)<sub>2</sub>·6H<sub>2</sub>O, 0.16 M urea, and 0.13 M NH<sub>4</sub>F in 100 mL of Teflon-lined stainless-steel autoclave, followed by sealing and heating at 95 °C with heating rate of 2 °C min<sup>-1</sup> for 12 h. After the hydrothermal reaction was finished, the Co-Zn-(OH-CO<sub>3</sub>) sample was rinsed with ethanol and DI water 3 times each, and dried at 60 °C for 1 day in air.

### **Synthesis of Co-Zn oxide sample**

The precursor Co-Zn-(OH-CO<sub>3</sub>) was annealed in air at 500 °C for 3 h to convert into Co-Zn oxide sample, as one of the counterparts of the Co<sub>3</sub>O<sub>4</sub> NPs/Co-Zn nitride.

### **Synthesis of Pt/C- and RuO<sub>2</sub>-based electrodes**

Catalyst ink was prepared by dissolving 2.1 mg of Pt/C or RuO<sub>2</sub> in the mixed solution of 100 μL of DI water, 400 μL of ethanol, 30 μL of Nafion with the association of sonication for 0.5 h. Next, the as-fabricated catalyst ink was coated on nickel foam (1 cm × 1 cm) and then dried at 60 °C for 24 h.

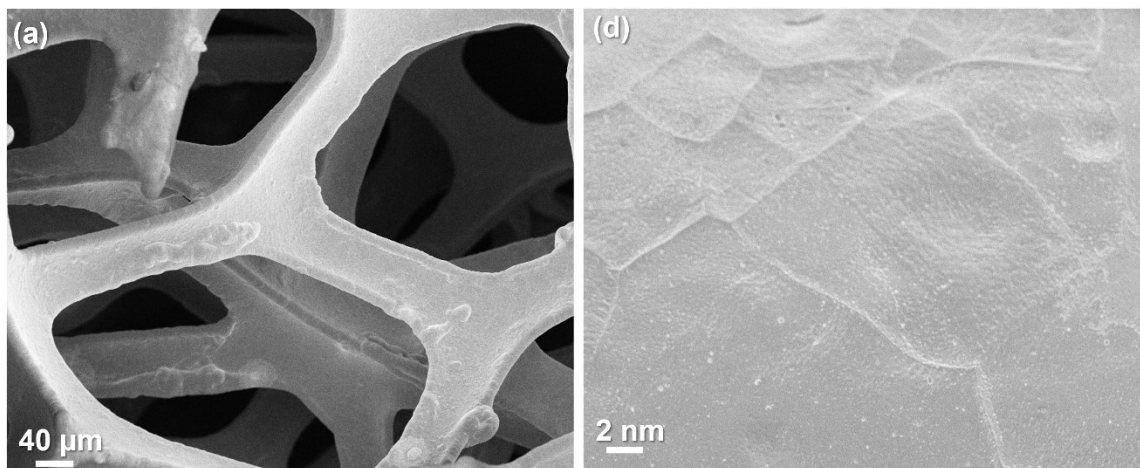

**Figure S1.** SEM images of nickel foam at different magnifications.

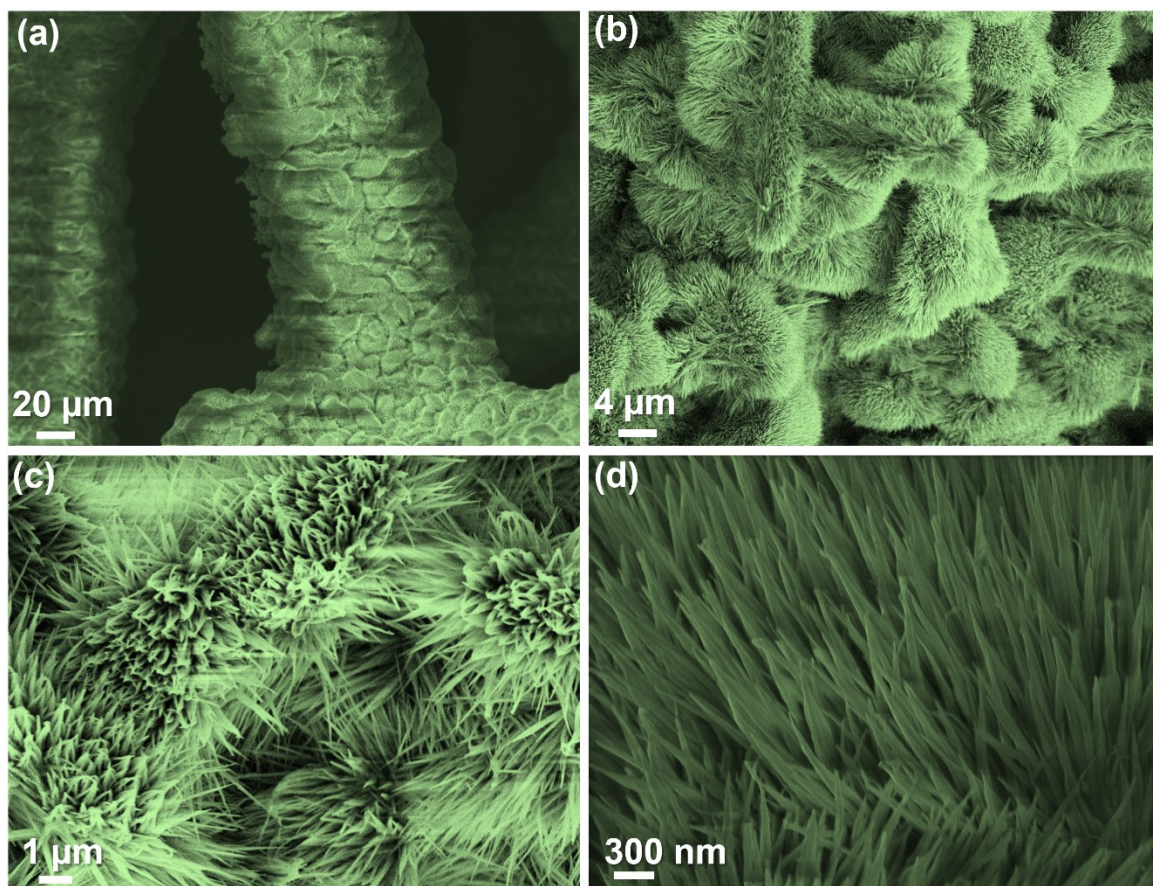

**Figure S2.** SEM images of Co-Zn-(OH-CO<sub>3</sub>) at different magnifications.

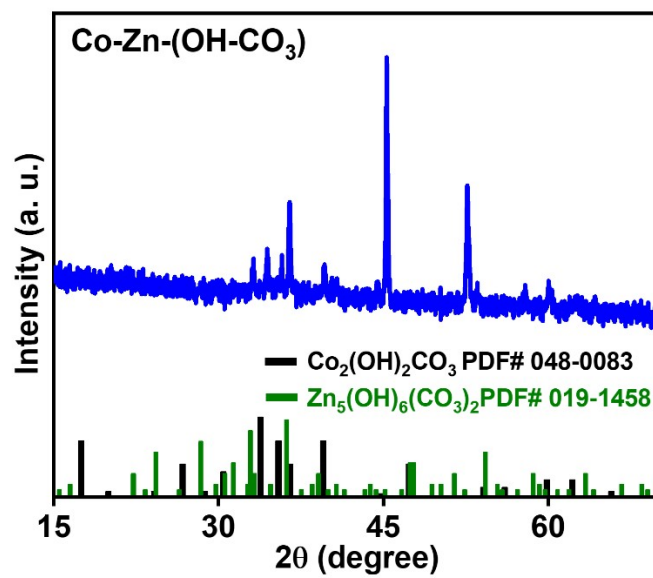

Figure S3. XRD pattern of Co-Zn-(OH-CO<sub>3</sub>).

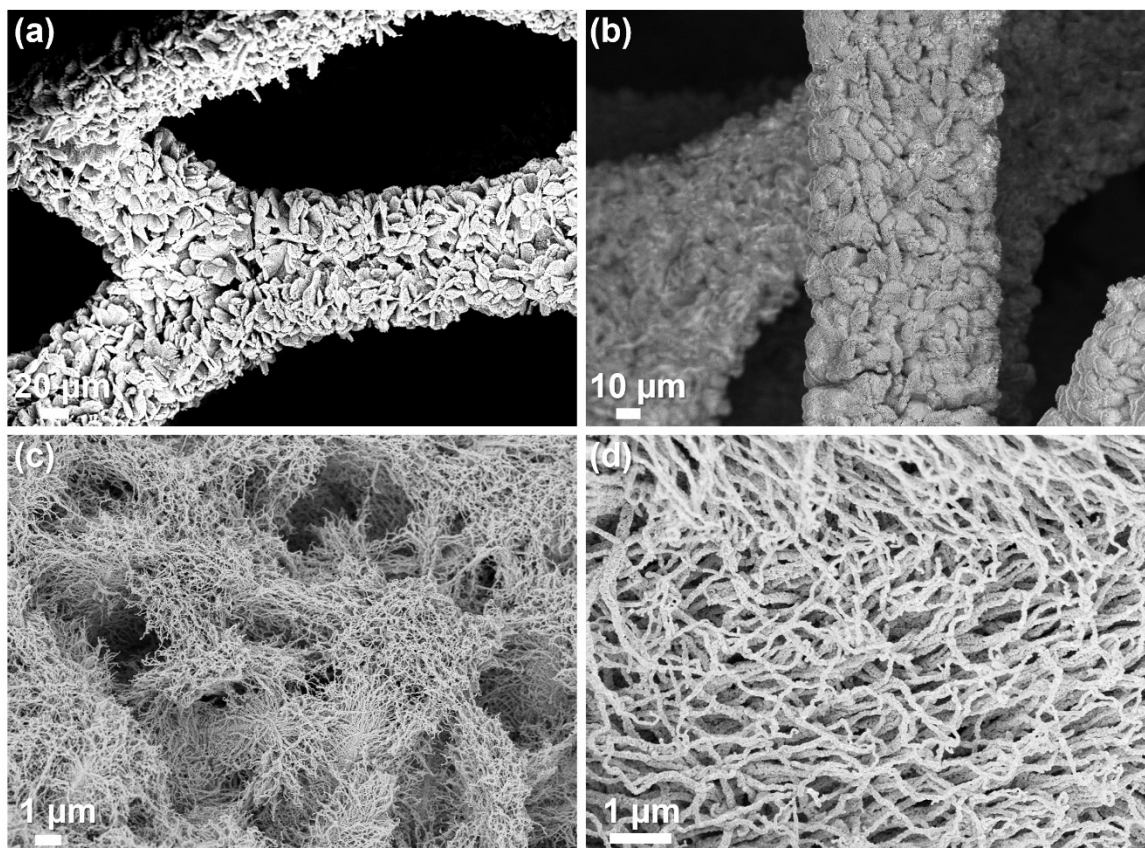

**Figure S4.** SEM images of Co-Zn nitride at different magnifications.

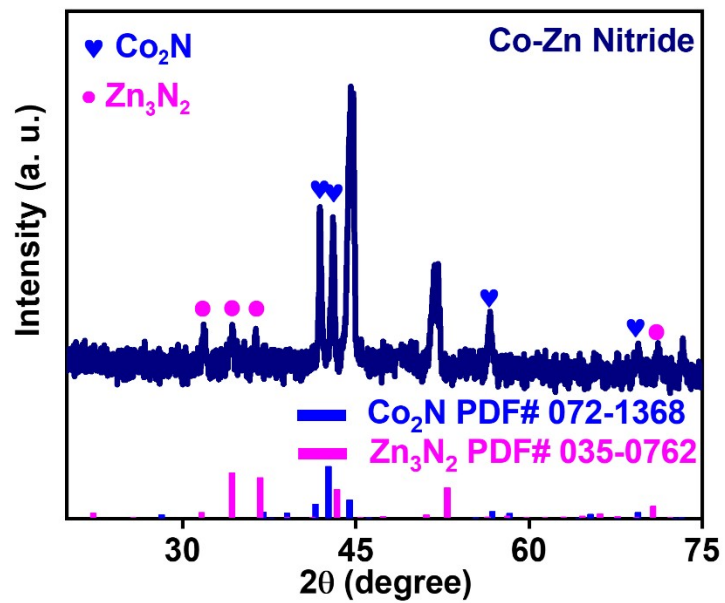

Figure S5. XRD pattern of Co-Zn nitride.

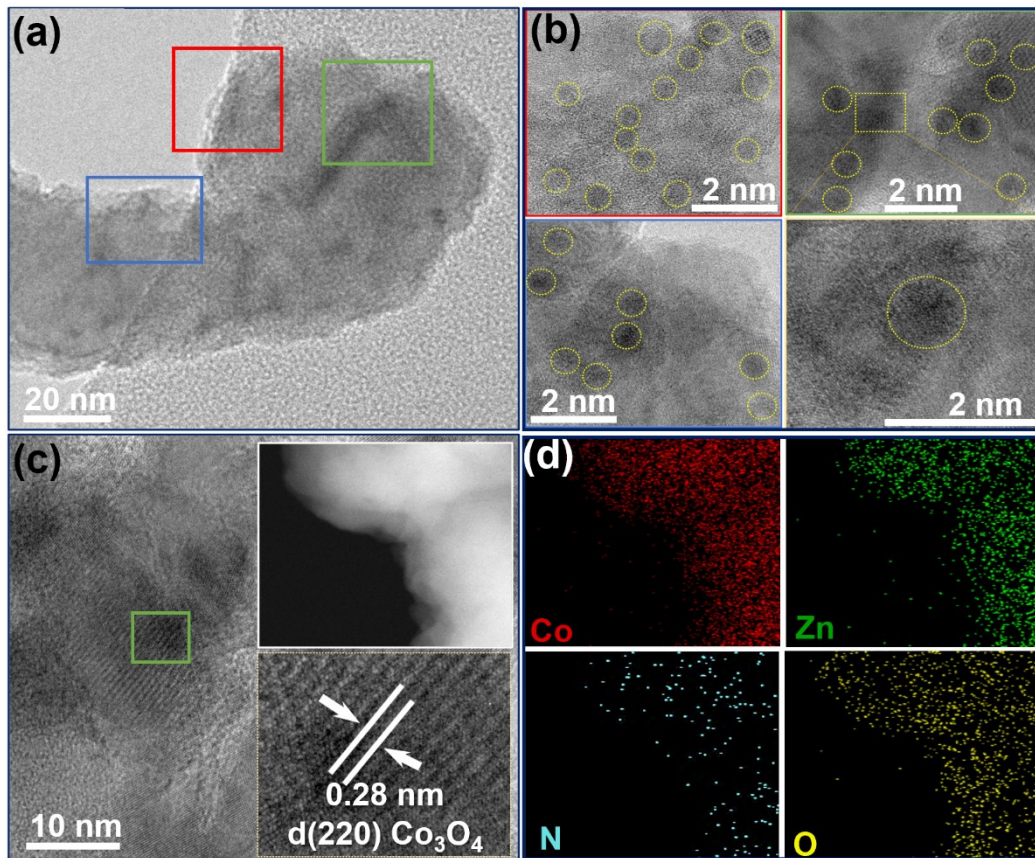

**Figure S6.** (a) TEM image, (b) and (c) HR-TEM images (the inset of (c) is d(220) crystalline plane of a  $\text{Co}_3\text{O}_4$  nanocrystal on the  $\text{Co}_3\text{O}_4$  NPs/Co-Zn nitride (below) and scanning TEM of  $\text{Co}_3\text{O}_4$  NPs/Co-Zn nitride (up)), and (d) EDS mapping images of the  $\text{Co}_3\text{O}_4$  NPs/Co-Zn nitride.



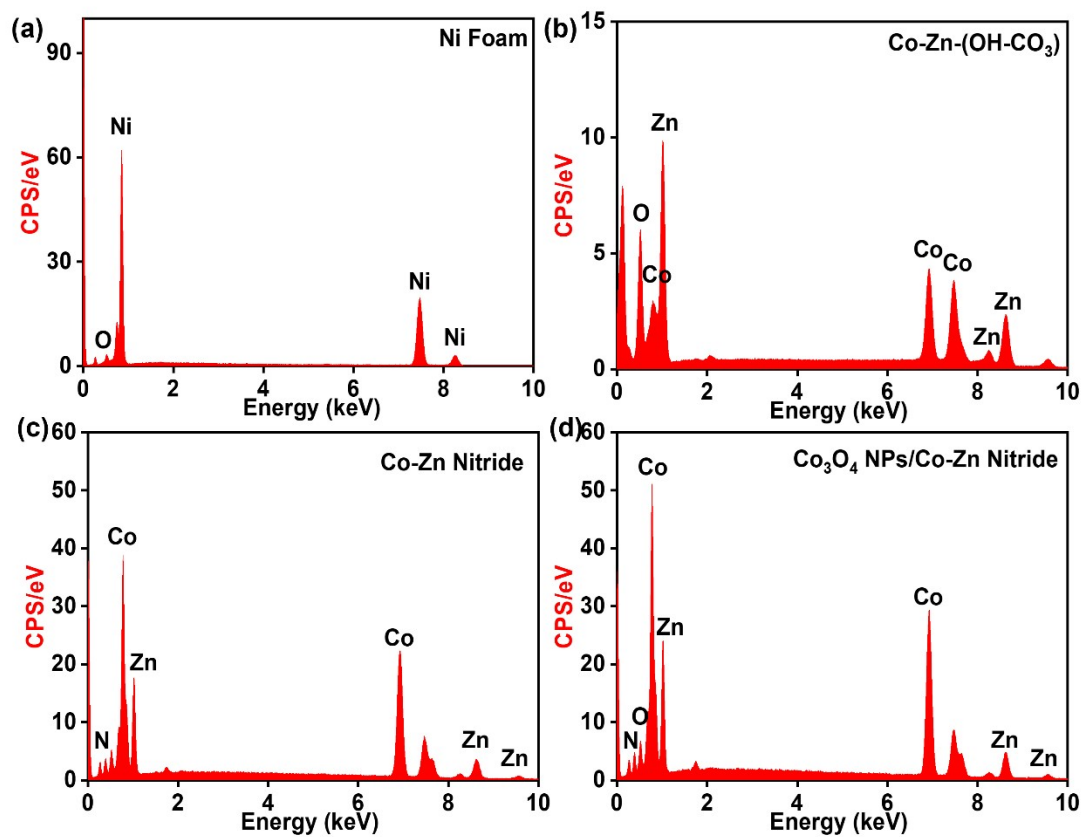

**Figure S7.** EDS spectra of (a) nickel foam, (b) Co-Zn-(OH-CO<sub>3</sub>), (c) Co-Zn nitride, and (d)

Co<sub>3</sub>O<sub>4</sub> NPs/Co-Zn nitride.

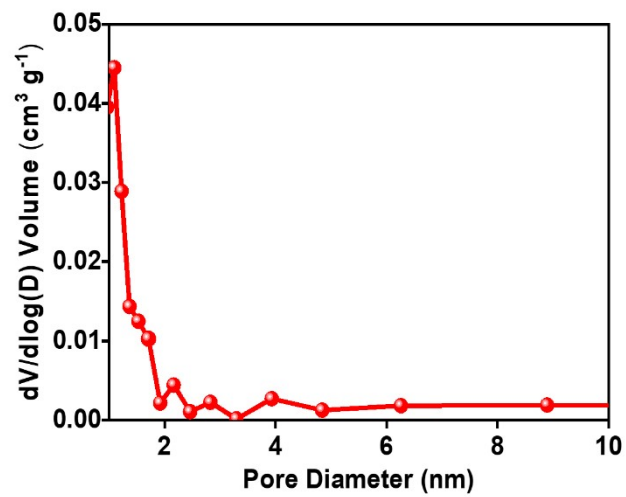

**Figure S8.** Pore size distribution of the Co<sub>3</sub>O<sub>4</sub> NPs/Co-Zn nitride.

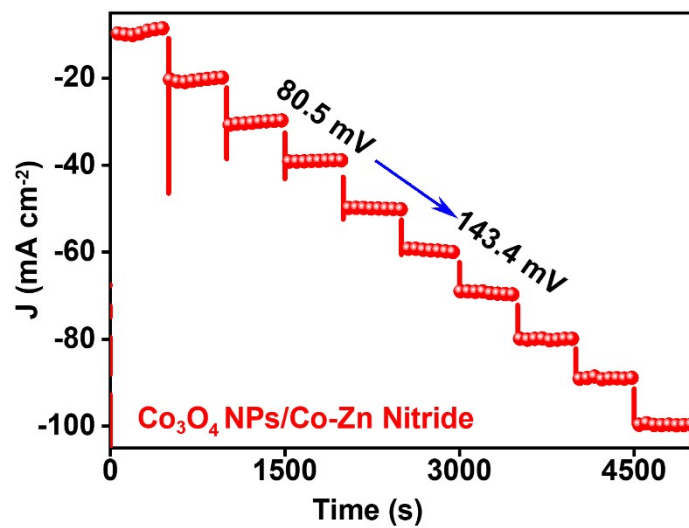

**Figure S9.** Multi-step chronoamperometric curve of the Co<sub>3</sub>O<sub>4</sub> NPs/Co-Zn nitride under HER conditions.

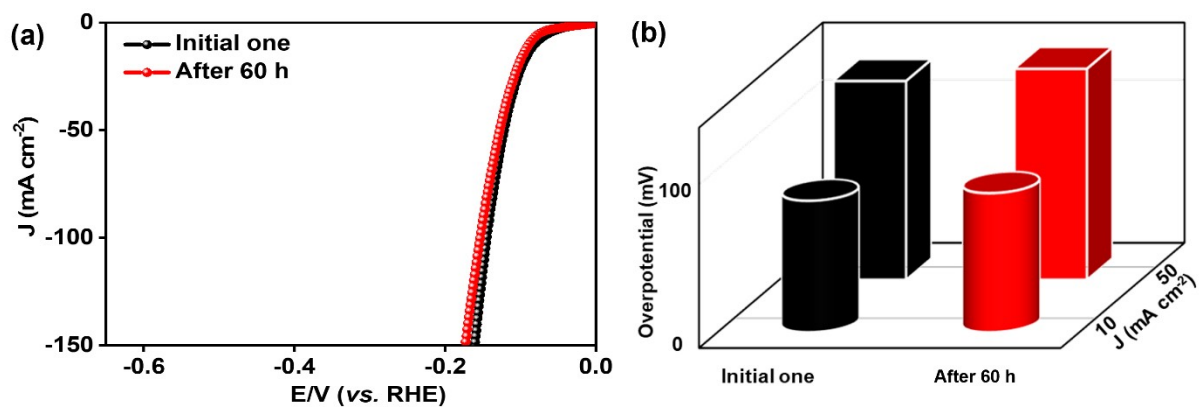

**Figure S10.** (a) LSV curves and (b) overpotentials at 10 and 50 mA cm<sup>-2</sup> of the Co<sub>3</sub>O<sub>4</sub> NPs/Co-Zn nitride determined before and after HER stability testing.

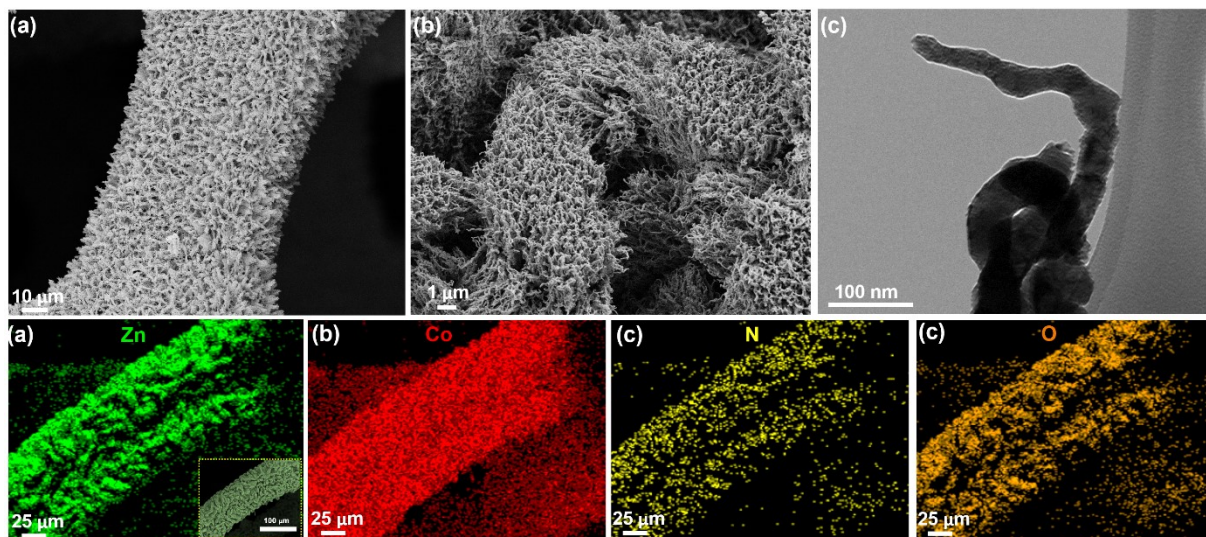

**Figure S11.** (a) and (b) SEM images, (c) TEM image, (d)-(g) EDS mapping images of the post-HER  $\text{Co}_3\text{O}_4$  NPs/Co-Zn nitride.

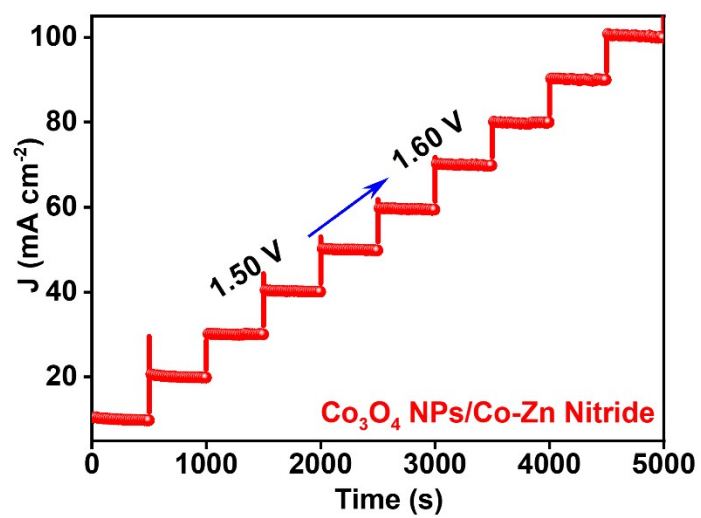

**Figure S12.** Multi-step chronoamperometric curve of the Co<sub>3</sub>O<sub>4</sub> NPs/Co-Zn nitride under OER conditions.

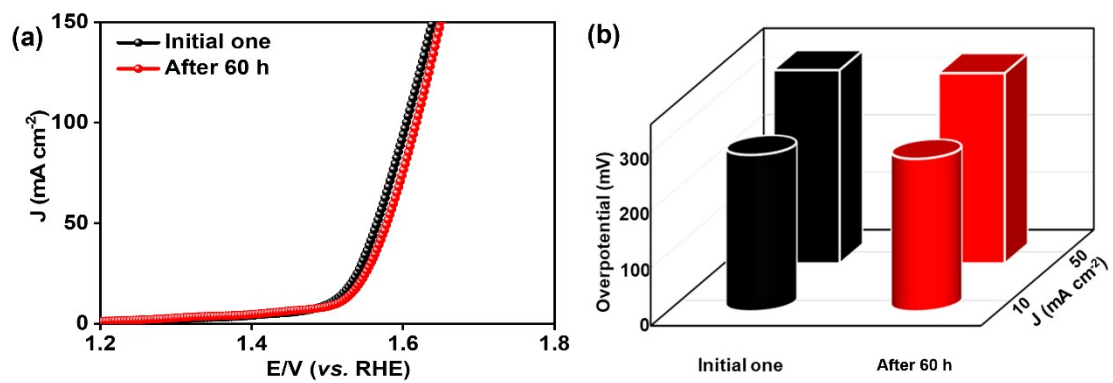

**Figure S13.** (a) LSV curves and (b) overpotentials at 10 and 50 mA cm<sup>-2</sup> of the Co<sub>3</sub>O<sub>4</sub> NPs/Co-Zn nitride determined before and after OER stability testing.

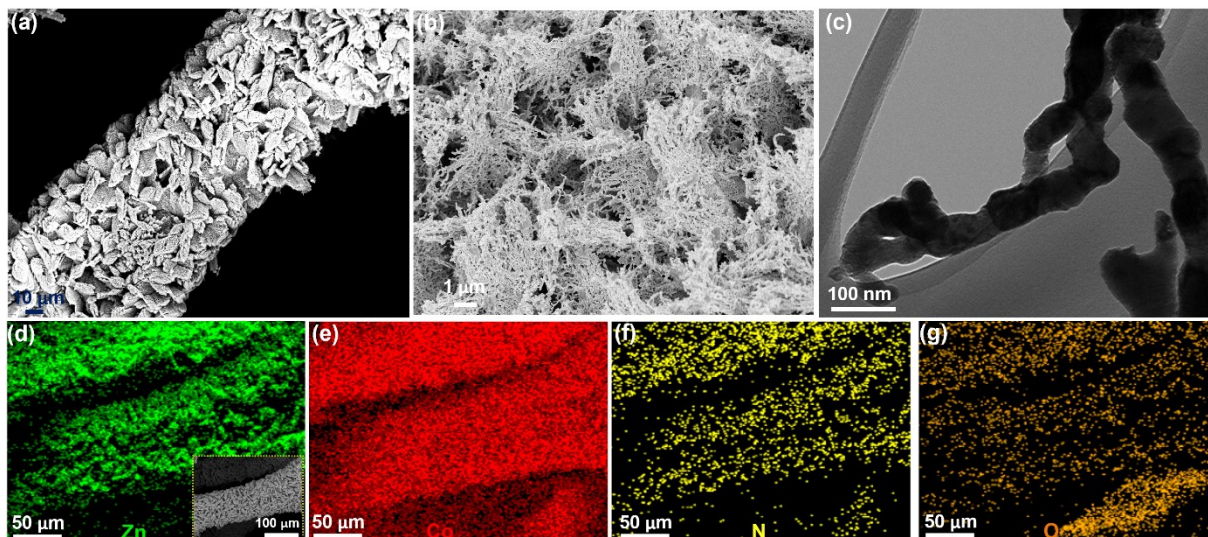

**Figure S14.** (a) and (b) SEM images, (c) TEM image, (d)-(g) EDS mapping images of the post-OER  $\text{Co}_3\text{O}_4$  NPs/Co-Zn nitride.



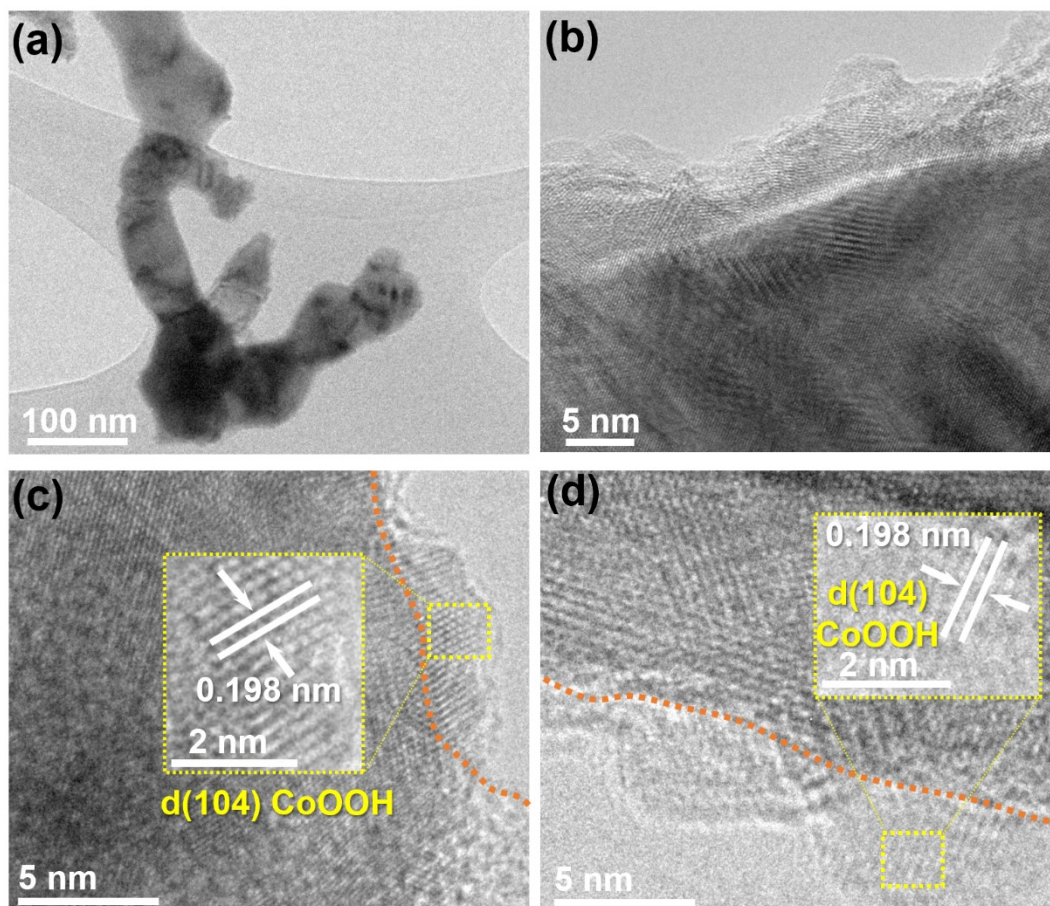

**Figure S15.** (a) and (b) Magnified TEM images, and (c) and (d) HR-TEM images of the post-OER  $\text{Co}_3\text{O}_4$  NPs/Co-Zn nitride.

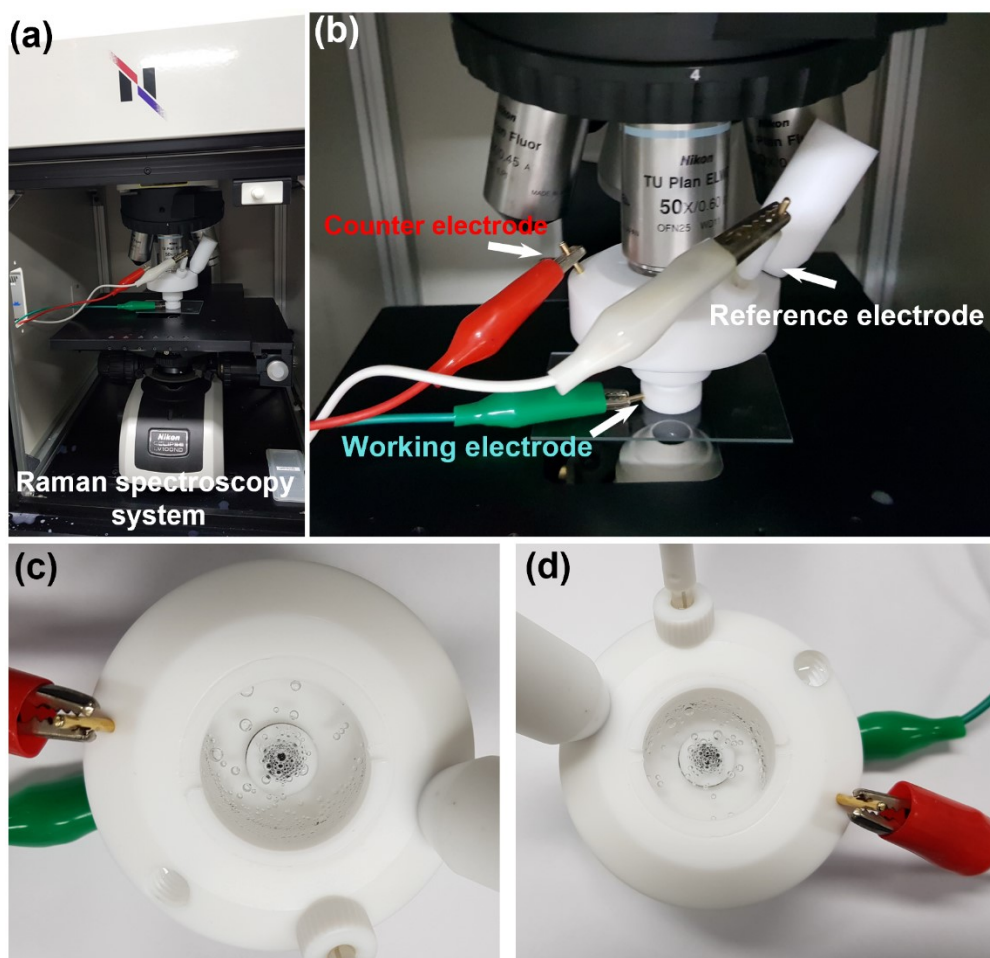

**Figure S16.** (a) and (b) The photographs of the Raman spectroscopy system. The photographs of  $\text{Co}_3\text{O}_4$  NPs/Co-Zn nitride sample during *in situ* Raman analysis under (c) HER conditions and (d) OER conditions.

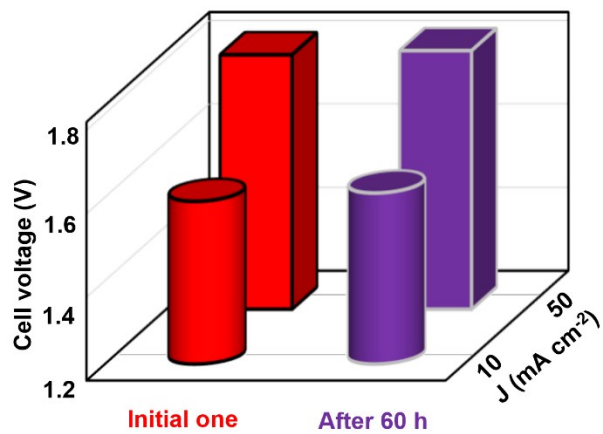

**Figure S17.** Cell voltages at 10 and 50 mA cm<sup>-2</sup> of the Co<sub>3</sub>O<sub>4</sub> NPs/Co-Zn nitride (-, +) determined before and after stability testing under overall water-splitting.

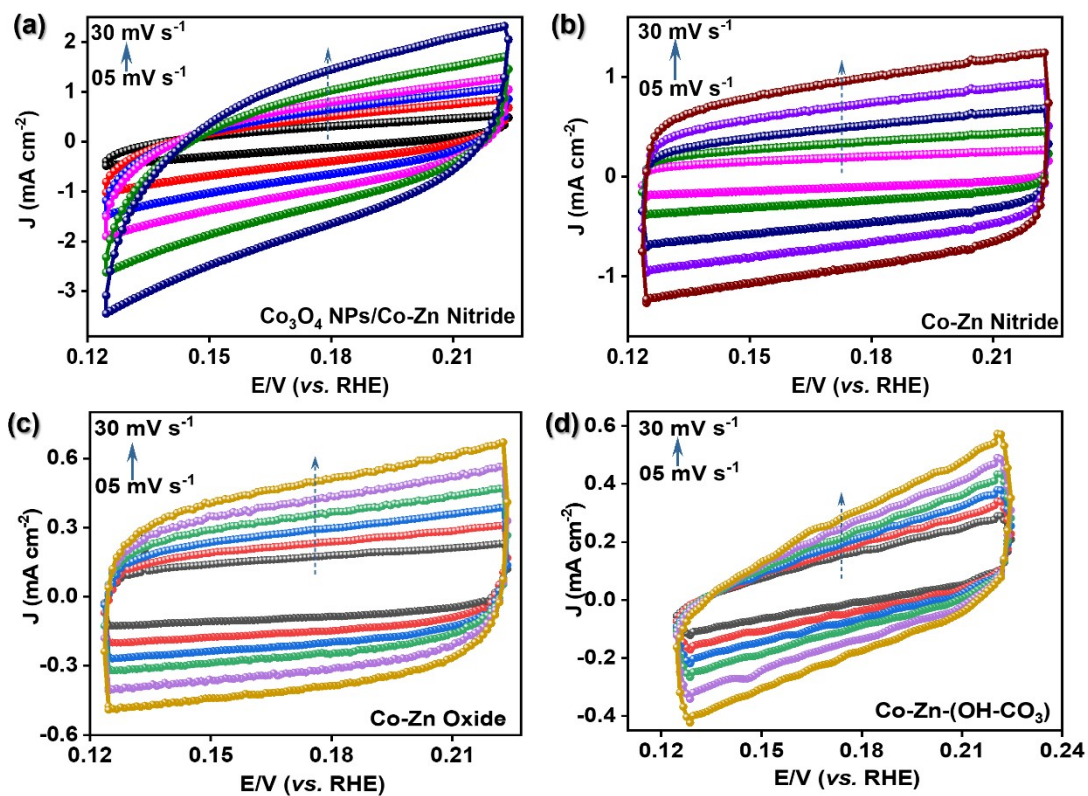

**Figure S18.** CV curves at different scan rates of (a) the  $\text{Co}_3\text{O}_4$  NPs/Co-Zn nitride, (b) Co-Zn nitride, (c) Co-Zn oxide, and (d) Co-Zn-(OH- $\text{CO}_3$ ).

**Table S1.** The Co percentage in the Co-Zn nitride and Co<sub>3</sub>O<sub>4</sub> NPs/Co-Zn nitride samples by

XPS analysis

| <b>Samples</b>                                                  | <b>Co percentage (at %)</b> |
|-----------------------------------------------------------------|-----------------------------|
| Co-Zn nitride                                                   | 23.43                       |
| Co <sub>3</sub> O <sub>4</sub> NPs/Co-Zn nitride                | 37.51                       |
| Co percentage of Co <sub>3</sub> O <sub>4</sub> NPs: 14.08 at % |                             |

**Table S2.** HER overpotential of the Co<sub>3</sub>O<sub>4</sub> NPs/Co-Zn nitride at current density of 10 mA cm<sup>-2</sup><sup>2</sup> compared to those of other noble-metal-free HER electrocatalysts.

| Catalysts                                                | Overpotential<br>(10 mA cm <sup>-2</sup> ) | References                                       |
|----------------------------------------------------------|--------------------------------------------|--------------------------------------------------|
| NiCoP/CNF                                                | 130                                        | Adv. Energy Mater. 2018, 8, 20, 1800555.         |
| Ni/Mo <sub>2</sub> C- NCNFs                              | 143.0                                      | Adv. Energy Mater. 2019, 9, 1803185              |
| CoP/TiO <sub>x</sub>                                     | 337                                        | Small, 2020, 16, 2, 1905075.                     |
| MoP/NPG                                                  | 126                                        | Appl. Catal., B: Environ, 2020, 260, 118196.     |
| 1D-DRHA MoS <sub>2</sub>                                 | 119.0                                      | Appl. Catal. B, 2019, 258, 117964                |
| FeCo/Co <sub>2</sub> P@NPCF                              | 260                                        | Adv. Energy Mater. 2020, 10, 10, 1903854         |
| MoS <sub>2</sub> -Ni <sub>3</sub> S <sub>2</sub> HNRs/NF | 98.0                                       | ACS Catal. 2017, 7, 4, 2357–2366                 |
| Co-P/FTO                                                 | 254                                        | Angew. Chem. Int. Ed. 2020, 59, 39, 17172-17176. |
| MoS <sub>x</sub> @NiO                                    | 406.0                                      | Adv. Funct. Mater. 2019, 29, 1807562             |
| CoP@FeCoP/NC YSMPs                                       | 141                                        | Chem. Eng. J. 2021, 403, 126312.                 |
| SrRuO <sub>3</sub> /CNT                                  | 109.0                                      | ACS Appl. Energy Mater. 2019, 2, 956–960         |
| <b>Co<sub>3</sub>O<sub>4</sub> NPs/Co-Zn nitride</b>     | <b>80.5</b>                                | <b>This work</b>                                 |

**Table S3.** OER overpotential of Co<sub>3</sub>O<sub>4</sub> NPs/Co-Zn nitride at current density of 10 mA cm<sup>-2</sup>

compared to those of other noble-metal-free OER electrocatalysts.

| Catalysts                                                                 | Overpotential<br>at 10 mA cm <sup>-2</sup> | References                                           |
|---------------------------------------------------------------------------|--------------------------------------------|------------------------------------------------------|
| CoS <sub>x</sub> @Cu <sub>2</sub> MoS <sub>4</sub> -MoS <sub>2</sub> /NSG | 351.4                                      | Adv. Energy Mater. 2020, 10, 8, 1903289.             |
| Co <sub>2</sub> P/CoNPC                                                   | 328                                        | Adv. Funct. Mater, 2020, 32, 36, 2003649.            |
| Co <sub>1.5</sub> Fe <sub>0.5</sub> P                                     | 278                                        | Angew. Chem. Int. Ed. 2020, 59, 1, 465-470.          |
| MoS <sub>x</sub> @NiO                                                     | 406.0                                      | Adv. Funct. Mater. 2019, 29, 1807562                 |
| D-CoP-HoMSs                                                               | 294                                        | Angew. Chem. Int. Ed., 2021, 133, 13, 7002-7007      |
| CoP (MoP)-CoMoO <sub>3</sub> /CN                                          | 296                                        | ACS Appl. Mater. Interfaces. 2019, 11, 7, 6890-6899. |
| D-CoP-HoMSs                                                               | 294                                        | Angew. Chem. Int. Ed., 2021, 133, 13, 7002-7007      |
| O-CoP-2                                                                   | 310                                        | Adv. Funct. Mater, 2020, 30, 7, 1905252.             |
| Ni-CoP                                                                    | 290                                        | Nano Lett. 2021, 21, 1, 823–832                      |
| Mn-Co-P YS                                                                | 330                                        | Chem. Eng. J. 2021, 405, 126580.                     |
| <b>Co<sub>3</sub>O<sub>4</sub> NPs/Co-Zn nitride</b>                      | <b>271.7</b>                               | <b>This work</b>                                     |
